# Supplementary material
Source: publisher figshare collection journal article supplement (https://sage.figshare.com/ndownloader/files/17398535)
Supplement: Supplementary file 1 [file 17398535]

**Supplemental Table 1.** Additional baseline characteristics of the patients (n=357)

| Characteristics                                      | n (%)       |
|------------------------------------------------------|-------------|
| Income level                                         |             |
| No income                                            | 35 (9.8%)   |
| <5000 Baht                                           | 47 (13.2%)  |
| Illicit drug use                                     |             |
| Have used prior                                      | 6 (1.7%)    |
| Current                                              | 3 (0.8%)    |
| Smoking history                                      |             |
| Never smoked                                         | 227 (63.6%) |
| Ex-smoker                                            | 80 (22.4%)  |
| Currently smoking                                    | 50 (14.0%)  |
| Alcohol history                                      |             |
| Never drunk                                          | 282 (79.0%) |
| Ex-drinker                                           | 47 (13.2%)  |
| Currently drinking                                   | 28 (7.8%)   |
| Type of antiretroviral regimen                       |             |
| Non-nucleoside reverse transcriptase inhibitor-based | 196 (54.9%) |

| Characteristics                             | n (%)       |
|---------------------------------------------|-------------|
| Protease inhibitor-based                    | 114 (31.9%) |
| Integrase strand transfer inhibitor-based   | 12 (3.4%)   |
| Other                                       | 35 (9.8%)   |
| Mode of HIV transmission                    |             |
| Heterosexual transmission                   | 264 (73.9%) |
| Homosexual transmission                     | 44 (12.3%)  |
| Intravenous drug use                        | 2 (0.6%)    |
| Blood transfusion                           | 1 (0.3%)    |
| Unknown                                     | 36 (10.1%)  |
| Other                                       | 4 (1.1%)    |
| Duration of HIV infection (years)           |             |
| Mean (SD)                                   | 17.7 (4.8)  |
| Min-Max                                     | 2.2-28.1    |
| Duration on antiretroviral (years)          |             |
| Mean (SD)                                   | 15.4 (4.5)  |
| Min-Max                                     | 0.9-25.8    |
| CDC HIV classification at time of diagnosis |             |

| Characteristics                   | n (%)       |
|-----------------------------------|-------------|
| A                                 | 159 (44.5%) |
| B                                 | 144 (40.3%) |
| C                                 | 54 (15.1%)  |
| CDC HIV classification at present |             |
| A                                 | 135 (37.8%) |
| B                                 | 162 (45.4%) |
| C                                 | 56 (15.7%)  |
| Unknown                           | 4 (1.1%)    |
| Body Mass Index (BMI) category    |             |
| Underweight (<18.5)               | 26 (7.3%)   |
| Normal (18.5-24.9)                | 238 (66.7%) |
| Overweight (25-29.9)              | 82 (23.0%)  |
| Obesity (>30)                     | 11 (3.1%)   |
| Waist circumference (cm)          |             |
| Mean (SD)                         | 34.3 (9.4)  |
| Min-Max                           | 63-133      |
| Hip circumference (cm)            |             |

| Characteristics                                       | n (%)         |
|-------------------------------------------------------|---------------|
| Mean (SD)                                             | 91.2 (6.8)    |
| Min-Max                                               | 65-116        |
| Waist/Hip ratio                                       |               |
| Mean (SD)                                             | 0.9 (0.1)     |
| Min-Max                                               | 0.7-1.3       |
| Mean systolic/diastolic blood pressure (mmHg)         | 128/78        |
| Mean laboratory data (SD)                             |               |
| Total cholesterol (mg/dL)                             | 208.2 (45.2)  |
| Triglycerides (mg/dL)                                 | 179.9 (106.9) |
| High density lipoproteins (HDL) (mg/dL)               | 48.7 (14.9)   |
| Low density lipoproteins (LDL) by calculation (mg/dL) | 124.2 (37.6)  |
| Hemoglobin (g/dL)                                     | 14.0 (1.7)    |
| Platelet (10 <sup>9</sup> /liter)                     | 258.1 (67.3)  |
| Aspartate transaminase (AST) (u/L)                    | 29.8 (21.2)   |
| Alanine transaminase (ALT) (u/L)                      | 35.6 (31.5)   |
| Fasting plasma glucose (mg/dL)                        | 98.3 (25.9)   |
| Creatinine (mg/dL)                                    | 0.9 (0.3)     |

| Characteristics                                                          | n (%)       |
|--------------------------------------------------------------------------|-------------|
| Estimated glomerular filtration rate (eGFR) (ml/min/1.73m <sup>2</sup> ) | 84.5 (19.1) |
| Kidney stage                                                             |             |
| Stage 1 (≥ 90)                                                           | 138 (38.7%) |
| Stage 2 (60-89)                                                          | 188 (52.7%) |
| Stage 3A (45-59)                                                         | 24 (6.7%)   |
| Stage 3B (30-44)                                                         | 7 (2.0%)    |
| Stage 4 (15-29)                                                          | 0 (0%)      |
